# Supplementary material for: Metformin enhances the antitumor activity of oncolytic herpes simplex virus HF10 (canerpaturev) in a pancreatic cell cancer subcutaneous model
Source: PubMed Central journal article supplement (PMC9747797; doi:10.1038/s41598-022-25065-w), 2022-12-13
Supplement: 41598_2022_25065_MOESM1_ESM.pdf [file 41598_2022_25065_MOESM1_ESM.pdf]

**Metformin enhances the antitumor activity of oncolytic herpes simplex virus HF10 (canerpaturev) in a pancreatic cell cancer subcutaneous model**

Mohamed Abdelmoneim, Ibrahim R. Eissa, Mona Al Hussein Mostafa Aboalela, Yoshinori Naoe, Shigeru Matsumura, Patricia A. Sibal, Itzel Bustos-Villalobos, Maki Tanaka, Yasuhiro Kodera & Hideki Kasuya

Supplementary Figure 1. Metformin does not enhance cell cytotoxicity induced by C-REV *in vitro*.

a

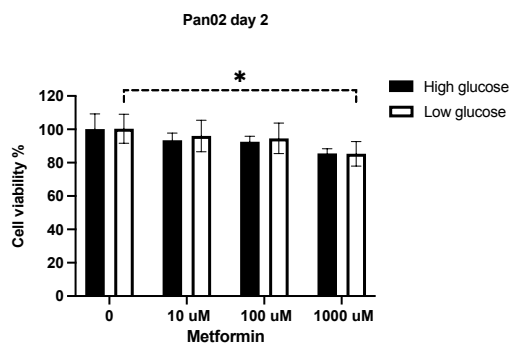

b

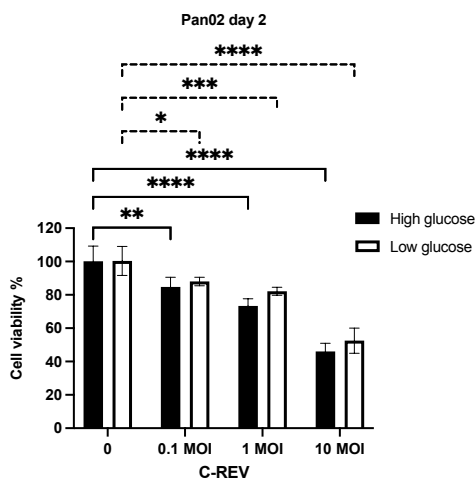

c

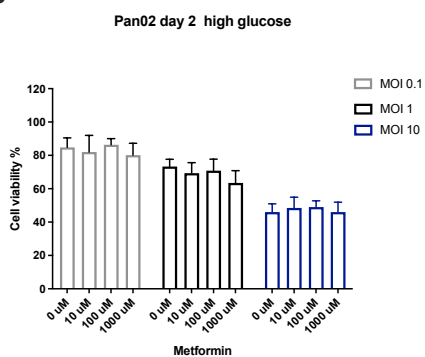

d

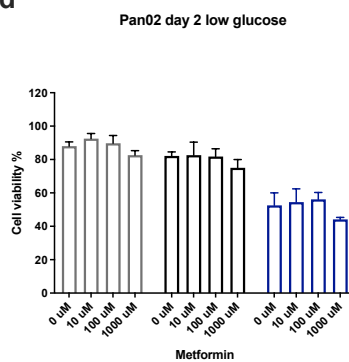

e

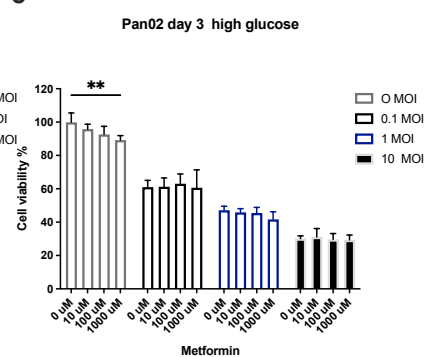

f

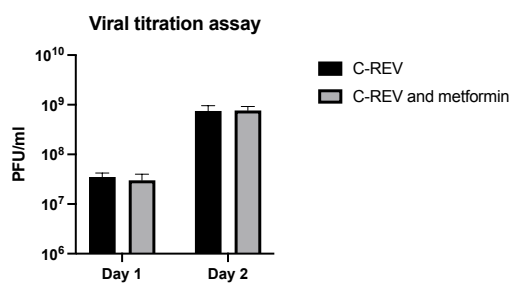

**Supplementary Figure 1. Metformin does not enhance cell cytotoxicity induced by C-REV *in vitro*.**

**(a)** Cytotoxicity of Pan02 after treatment with different concentrations of metformin (0, 10  $\mu$ M, 100  $\mu$ M, 1 mM) in medium containing high and low glucose (25 mM and 5.5 mM) for 2 days was determined by MTT assay. **(b)** Cytotoxicity of Pan02 after treatment with different MOI (0, 0.1, 1 and 10 MOI) of C-REV in medium containing high and low glucose for 2 days was determined by MTT assay. **(c, d)** Cytotoxicity of Pan02 after treatment with metformin and infected with several MOI of C-REV in medium containing high (c) and low (d) glucose for 2 days was determined by MTT assay.

**(e)** Cytotoxicity of Pan02 after treatment with metformin and infected with several MOI of C-REV in medium containing high glucose for 3 days was determined by MTT assay. Data are presented as mean  $\pm$  SD (n=6). Each experiment was conducted at least three times, yielding similar results. Two-way ANOVA followed by Tukey's multiple comparisons tests was performed. **(f)** *In vitro* replication of C-REV (MOI 1) over a 2-day period, co-incubated with 100  $\mu$ M of metformin, as assessed by viral titer. Data are presented as mean  $\pm$  SD (n=3). \* p < 0.05, \*\* p < 0.01, \*\*\* p < 0.001, \*\*\*\* p < 0.0001.

**Supplementary Figure 2. Combination therapy does not increase IFN- $\gamma$  production from CD8<sup>+</sup> CD3<sup>+</sup> TILs at day 3.**

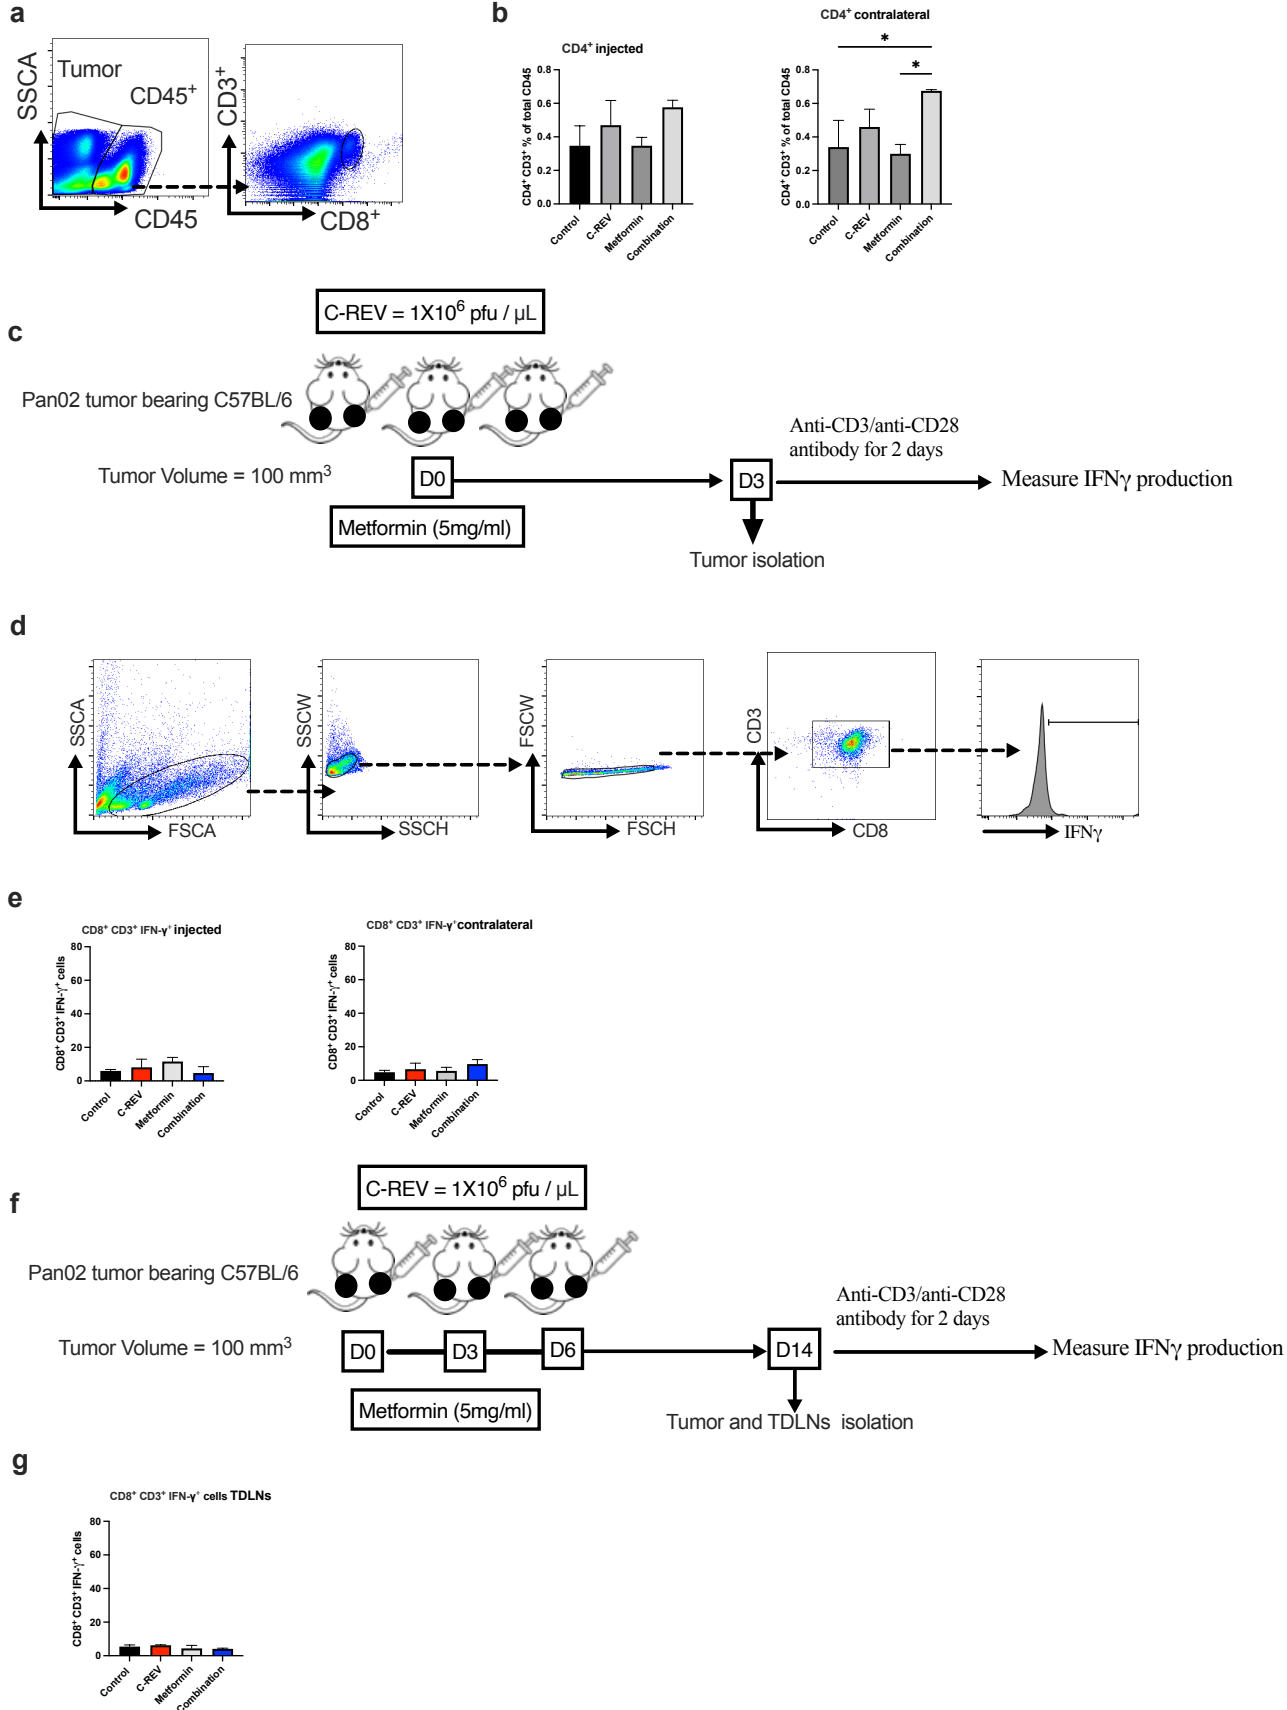

**Supplementary Figure 2. Combination therapy does not increase IFN- $\gamma$  production from CD8<sup>+</sup> CD3<sup>+</sup> TILs at day 3.** (a) Gating strategy for detection of CD8<sup>+</sup> CD3<sup>+</sup> and CD4<sup>+</sup> CD3<sup>+</sup> TILs. (b) Bar graphs show the percentage CD4<sup>+</sup> CD3<sup>+</sup> cells on the injected and contralateral sides. (c) A scheme shows schedule of C-REV and metformin treatment in C57BL/6 tumor-bearing mice for 3 days. (d) Gating strategy for detection of IFN- $\gamma$  production from CD8<sup>+</sup> CD3<sup>+</sup> TILs. (e) Bar graphs show the percentage of IFN- $\gamma$  production from CD8<sup>+</sup> CD3<sup>+</sup> cells on the injected and contralateral sides. (f) A scheme shows the schedule of C-REV and metformin treatment in C57BL/6 tumor-bearing mice for 14 days. (g) A bar graph shows the percentage of IFN- $\gamma$  production from CD8<sup>+</sup> CD3<sup>+</sup> cells in TDLNs. Data are presented as mean  $\pm$  SD (n=3 mice). One-way ANOVA with a post-hoc Tukey's tests was performed.

# Supplementary Figure 3. Effect of combination therapy on T cell population in tumors and TDLNs.

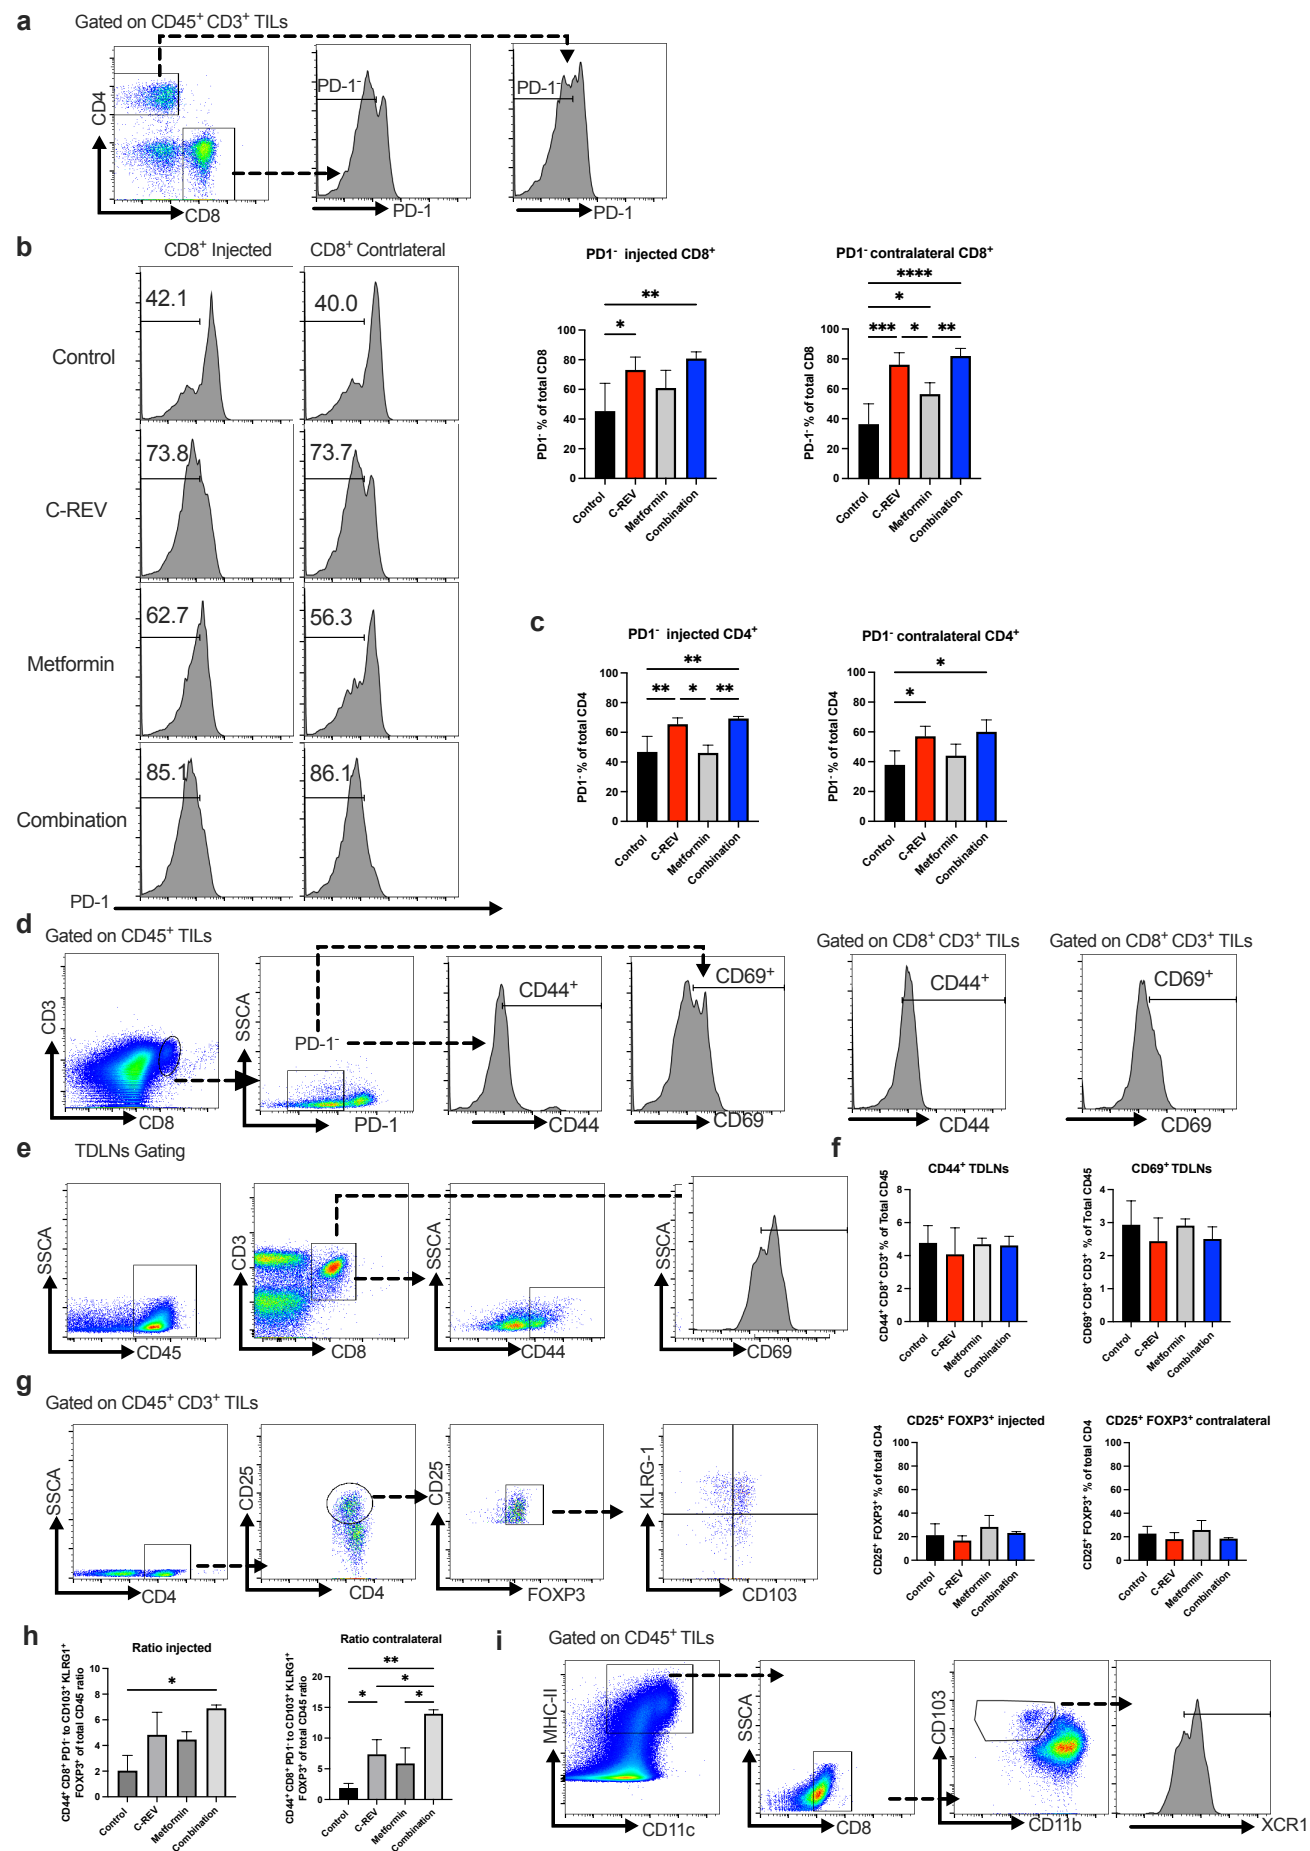

**Supplementary Figure 3. Effect of combination therapy on T cell population in tumors and TDLNs.** Mice were inoculated with Pan02 tumors as in Fig. 1A, tumors, and TDLNs were collected as previously shown. **(a)** Gating strategy for detection of PD-1<sup>-</sup> expression on CD8<sup>+</sup> and CD4<sup>+</sup> TILs. **(b)** Representative histograms show PD-1<sup>-</sup> expression on CD8<sup>+</sup> TILs cells on the injected and contralateral sides and bar graphs show percentage of PD-1<sup>-</sup> expression on CD8<sup>+</sup> TILs cells on the injected and contralateral sides. **(c)** Bar graphs show the percentage of PD-1<sup>-</sup> expression on CD4<sup>+</sup> TILs cells on the injected and contralateral sides. **(d)** Gating strategy for detection of CD44<sup>+</sup> and CD69<sup>+</sup> expression on CD8<sup>+</sup> CD3<sup>+</sup> and PD-1<sup>-</sup> CD8<sup>+</sup> TILs. **(e)** Gating strategy for detection of CD44<sup>+</sup> and CD69<sup>+</sup> expression on CD8<sup>+</sup> CD3<sup>+</sup> in TDLNs. **(f)** Bar graphs show the percentage of CD44<sup>+</sup> and CD69<sup>+</sup> on CD8<sup>+</sup> CD3<sup>+</sup> cells in TDLNs. Data are presented as mean ± SD (n=3 mice). **(g)** Gating strategy for detection of CD103<sup>+</sup> KLRG-1<sup>+</sup> expression on CD4<sup>+</sup> CD25<sup>+</sup> FOXP3<sup>+</sup> and bar graphs show the percentage of CD4<sup>+</sup> CD25<sup>+</sup> FOXP3<sup>+</sup> tumor-infiltrating T-reg cells on the injected and contralateral sides. **(h)** Bar graphs shows the ratio between CD44<sup>+</sup> CD8<sup>+</sup> PD-1<sup>-</sup> population and terminally differentiated CD103<sup>+</sup> KLRG-1<sup>+</sup> T-reg cells on the injected and contralateral sides **(i)** Gating strategy for detection of XCR-1 expression on cDC1 in tumor . Data are presented as mean ± SD (n=4 mice). This experiment was conducted at least two times . One-way ANOVA with a post-hoc Tukey's tests was performed.\* p < 0.05, \*\* p < 0.01, \*\*\* p < 0.001, \*\*\*\* p < 0.0001.
